1 **Title page**

2 Title

3 Acquirement of the autonomic nervous system modulation evaluated by heart rate variability in  
4 medaka (*Oryzias latipes*).  
5

6 **Authors**

7 Tomomi Watanabe-Asaka<sup>1,2,3\*</sup>, Maki Niihori<sup>1</sup>, Kento Igarashi<sup>2</sup>, Shoji Oda<sup>1,2</sup>, Ken-ichi Iwasaki<sup>1,4</sup>,  
8 Yoshihiko Katada<sup>2</sup>, Toshikazu Yamashita<sup>2</sup>, Hiroki Sonobe<sup>2,5</sup>, Masahiro Terada<sup>6</sup>, Shoji A. Baba<sup>7</sup>,  
9 Hiroshi Mitani<sup>2</sup> and Chiaki Mukai<sup>1</sup>  
10

11 Affiliations:

12 <sup>1</sup> Space Biomedical Research Office, JAXA, Tsukuba, Japan

13 <sup>2</sup> Department of Integrated Biosciences, Graduate School of Frontier Sciences, The University of  
14 Tokyo, Kashiwa, Japan

15 <sup>3</sup> Faculty of Medicine, Tohoku Medical and Pharmaceutical University, Sendai, Japan

16 <sup>4</sup> Department of Social Medicine, Division of Hygiene, Nihon University School of Medicine,

17 Tokyo, Japan

18 <sup>5</sup> Department of Biology, Faculty of Science, Toho University, Funabashi, Japan

19 <sup>6</sup> ISS Science Project Office, JAXA, Tsukuba, Japan

20 <sup>7</sup> Department of Biology, Ochanomizu University, Tokyo, Japan

21

22 \* Corresponding author

23 Tomomi Watanabe-Asaka, Ph.D.

24 Division of Physiology, Faculty of Medicine, Tohoku Medical and Pharmaceutical University,

25 Sendai, Japan

26 Tel: +81- 22-290-8716, Fax: +81- 22-290-8748

27 E-mail: [twatana@tohoku-mpu.ac.jp](mailto:twatana@tohoku-mpu.ac.jp)

28

29 Running head:

30 Autonomic regulation of heart rate variability in adult medaka

31

32 **Author contributions:**

33 T.W.-A., M.N., S.O., K.I., H.M., and C.M. conception and designed research; T.W.-A., M.N.,  
 34 K.I., S.O., T.Y., H.S. and M.T. performed experiments; T.W.-A., M.N., K.I., Y.K., and S.A.B.  
 35 analyzed data; T.W.-A., S.O., K.I., S.T., S.A.B., H.M., and C.M. interpreted results of  
 36 experiments; T.W.-A., and M.N. prepared figures; T.W.-A. drafted manuscript; and T.W.-A.,  
 37 S.O., K.I., H.M. and C.M. edited and revised manuscript; All authors approved final version of  
 38 manuscript.

39

40

# **Abstract**

Small teleosts have recently been established as models of human diseases. However, measuring heart rate by electrocardiography is highly invasive for small fish. The physiological nature and function of vertebrate autonomic nervous system (ANS) modulation of the heart has traditionally been investigated in larvae with an incompletely developed ANS or in anesthetized adults, whose ANS activity may possibly be disturbed under anesthesia. Here, we defined the frequency characteristics of heart rate variability (HRV) modulated by the ANS from observations of heart movement in high-speed movie images and changes in ANS regulation under environmental stimulation in unanesthetized adult medaka (*Oryzias latipes*), a small teleost.

The HRV was significantly reduced by atropine (1 mM) in the 0.25 – 0.65 Hz and by propranolol (100  $\mu$ M) at 0.65–1.25 Hz range, suggesting that HRV in adult medaka is modulated by both the parasympathetic and sympathetic nervous systems within these frequency ranges. Such modulations of HRV by the ANS were remarkably suppressed in anesthetized adult medaka. Continuous exposure to light suppressed HRV only in the 0.25 – 0.65 Hz range, indicating parasympathetic withdrawal. The power of HRV increased along developmental processes.

58 These results suggest that ANS modulation of the heart in adult medaka is frequency-dependent  
59 phenomenon, and that the impact of long-term environmental stimuli on ANS activities can be  
60 precisely evaluated in unanesthetized adult fish using this method.

61 Key words:

62 cardiac regulation; medaka; spectral analysis; autonomic nervous system; high speed imaging

# 64 Introduction

65 Living organisms continually respond to various types of environmental stress. The autonomic  
66 nervous system (ANS) plays an important role in adjusting the various physiological parameters  
67 in coordination with the hormonally-regulated endocrine system. The vertebrate heart responds to  
68 changes in physical and physiological conditions by regulating the heartbeat and accumulated  
69 evidence supports the notion that the vertebrate heart rate is controlled by the ANS, which  
70 comprises sympathetic and parasympathetic nervous systems [1]. Both branches of the ANS  
71 regulate cardiac activity; the parasympathetic system decreases, whereas the sympathetic system  
72 increases steady-state heart rate [2]. The ANS regulates heart rate variability (HRV) in addition to  
73 steady-state heart rate. Various types of analysis have been developed to observe HRV regulation  
74 by the ANS and to understand how the vertebrate ANS functions in humans and fish [3-7].  
75 Teleost fish are held to be the first in the phylogenetic tree to have a true ganglionated  
76 sympathetic trunk together with a distinct vagal system that is similar to that in mammals [8].

77 The function of the ANS in cardiac regulation has been investigated using  
78 electrocardiographic HRV analysis in anesthetized adult fish, as well as heart rate analysis using  
79 video imaging in embryos or in larvae just after hatching [9-12]. Analysis using the

electrocardiography (ECG) is effective in finding intrabeat abnormalities of the heart, such as QT prolongation. Therefore, studies using large fish such as scorpion fish or rainbow trout have been promoted by implanted electrode [13]. Analysis using an ECG is also used in small fish like zebrafish, however the method using needle electrodes in small fish such as zebrafish requires that placing to expose ventral side and put water directly from the mouth by tube with anesthesia or muscle relaxants. These methods are highly invasive, so that results in serious difficulties with HRV data acquisition from intact fish which is the target of this study [7, 11]. To maximally reduce the impact on the fish, the suppression of ANS activity by anesthesia needs to be eliminated and the invasiveness of the measurements needs to be reduced. However, although the popular anesthetic MS-222 (Tricaine) interferes with sympathovagal function in fish [10, 14], anesthesia is nevertheless required to obtain electrocardiographic measurements from adult fish and amphibians [15-17].

Imaging technologies have options less invasive than electrocardiography. Motion pictures allow analyses of heart development and heartbeat in immobilized embryos and larvae [18-21]. The fish heart comprises a single atrium and a single ventricle, which facilitates optical measurement and analysis. Heart movement in adult small fish can also be measured using

infrared light and high-frequency ultrasound, but these methods still require immobilizing adult fish with anesthetics [12, 22].

Small fish such as zebrafish and medaka have recently been established as models of human diseases [23-26]. Several pharmacological studies have recently found that larval-stage zebrafish express receptors for sympathetic and parasympathetic neural transmission and that heart rates in zebrafish larvae change in response to both sympathetic and parasympathetic input with or without anesthesia [16, 20, 27, 28]. However, one of these studies further demonstrated that the autonomic components of the reflex are poorly developed in 5-day-old larval zebrafish, indicating that ANS function is incompletely developed at this stage [20]. Motion pictures are difficult to acquire from highly mobile, opaque adult zebrafish and can only be obtained from transparent immobile embryos or immobilized larvae. Moreover, to evaluate long-term changes in ANS activity such as those induced by environmental changes, adult animals without major alterations in ANS activity during growth or sexual maturation should be studied.

Medaka are small teleosts that are native to East Asian freshwater systems and they have become popular models of human diseases because they are easily maintained in laboratories, their genetics and development are known in detail, and their whole genome has been sequenced



[29, 30]. In addition, medaka have several characteristic features that facilitates the study of ANS activities in unanesthetized adults: they are highly adaptive to a wide range of temperatures as well as to low oxygen content, prefer slowly flowing water and do not swim vigorously. The transparent strain, SukeSuke (SK2), has been established by crossing several spontaneous body-coloring mutants [31, 32] and SK2 heart movement can be observed through their transparent peritoneum. The present study determines the frequency characteristics of HRV modulation by the ANS and non-invasively quantifies ANS activities from spectral analyses of HRV in unanesthetized medaka using high-speed movie images of the heart.

## Materials and Methods

### Medaka strains and husbandry

Specimens of the medaka (*Oryzias latipes*) strain SukeSuke (SK2) reared in common tanks was obtained from our breeding colony. All experiments were proceeded on adult fish over 3 months after hatching whose body lengths were  $2.5 \pm 0.2$  cm. We also analyzed embryos at 6 days post-fertilization at the stage of heart function development (embryonic stage (St.) 36) [33]. The SK2 strain is homozygous for three recessive pigmentation mutations ( $b^{sg}$ ; null melanophore,  $lf$ ;

leucophore free, *gu*; guanineless) [31, 32] and without apparent abnormalities in cardiac activity during embryogenesis or as an adult. The fish and embryos were maintained under standard laboratory conditions at 26°C with a 14:10-h light-dark cycle in an incubator at 26°C. We maintained fish in tanks under light for 24 h/day for one week before HRV measurements (continuous light). All experiments were performed between 15:00 – 17:00 to avoid diurnal variations. Committees for Institutional Animal Care of the Japan Aerospace Exploration Agency and of the University of Tokyo approved the animal protocols.

## Pharmacology and reagents

Atropine (1 mM), propranolol (100 µM) or MS-222 (80 µg/mL Tricaine, Sigma-Aldrich) were added to a bath containing a small tank holding the fish [14]. Fish were acclimated to the observation container for 5 min before assays. Atropine or propranolol was administered to fish 5 min after starting the assays. MS-222 was administered for a minimum of 5 min before assays. Images of the heart area were taken for 20 min throughout the assays.

## Imaging system and digital video recording

Digital video recording of cardiac activities of adult fish and hatchlings were prepared as described before [34]. Water and oxygen and maintained at  $25 \pm 1$  °C throughout heart movement

recording. The swimming area for the fish was partially restricted without affecting ventilation and the heart rate of the fish in the tank was not altered for any longer than two hours. Each measurement was completed within 20 min, including the time to place the embryos into tanks and to establish a quiet, resting and steady state (usually within about 5 min). Heart movement in adult medaka was recorded by taking video movies of the ventral view of adult SK2 through the transparent peritoneum using an inverted stereomicroscope (LEICA Fluorescent Dissecting Microscope MZFLIII with a PLANAPO 1.0X lens) equipped with a digital high-speed camera (CASIO Exilim EX-F1) at 2.0X magnification [35].

Dechorionated embryos at St. 36 [33] were immobilized in the orientation appropriate for video recording using 2.5% methylcellulose in glass-bottomed dishes (Matsunami, Japan) and then heart movement was recorded using a stereomicroscope equipped with a digital high-speed camera (EX-F1) as described before [36]. Digital pictures at 300 frames per second (fps) with a resolution of 512 x 384 pixels were captured for up to 20 min and recorded in a PC using Final Cut Pro software (Apple Computer). Since 2 – 5 min data acquisition is recommended for HRV analysis in humans [4] and heart rate is faster in medaka than in humans, we acquired data for 3 minutes after recovery from heart rate acceleration caused by being placed in the tank. We

defined a stable heart rate as steady-state, which was similar ( $\pm 10$  bpm) between the first and last 3 min.

## **Extraction of cardiac activity**

We extracted the cardiac activities of adult fish, juveniles, larvae and embryos according to the previous papers [34, 36]. The pixel intensities of each ROI were digitalized throughout the entire time series examined using Bohboh software (Bohboh Soft, Tokyo, Japan) and further processed using Cutwin mathematical software (EverGreen Soft, Tokyo, Japan). Data were processed by taking a moving average over 21 frames. Finally, local maxima and minima detected using Cutwin software were identified as the end of systole and of diastole, respectively. The pixel intensity of the ROIs in the heart images of immobilized embryos was digitalized, movement-averaged over 21 frames and then local maxima and minima were similarly determined as described above.

## **Steady state heart rate, respiratory rate and power spectral analysis of**

### **HRV**

The period between pixel intensity minima representing the end of diastole provided the interbeat interval from which we calculated beat-by-beat heart rate. We then averaged

beat-by-beat heart rates during collection for 3 min to generate steady-state heart rates. Respiratory rates per minute were determined by counting the number of opercula movements in 30 sec of data collection for 3 min. Beat-by-beat heart rates were linearly interpolated and resampled at 8 Hz to create an equidistant time series for spectral analyses of HRV. The time series of heart rates was initially detrended with third-order polynomial fitting and then subdivided into 512-point segments with a 50% overlap, resulting in five data segments collected over a period of 3 min. Fast Fourier transform (FFT) was applied to obtain a power spectrum of HRV on each Hanning-windowed data segment and subsequently the power spectra of the five segments were subsequently averaged to calculate the autospectrum of HRV acquired during 3 min. The minimal resolution of these spectra was 0.015625 Hz. The data described above were processed using DADiSP software (DSP Development, Cambridge, MA, USA).

## Statistical analyses

Data were statistically analyzed using a one-way ANOVA followed by a comparison with control (Dunnett's post hoc test) using JMP software (SAS Japan, Tokyo, Japan). A P value of < 0.05 was considered statistically significant. Data are presented as means  $\pm$  s.d. of five fish or embryos per experiment.

# Results

## Steady-state heart rate and respiratory rate

The steady-state heart rate in the control fish was  $137.1 \pm 6.70$  bpm (Fig 1A,  $n = 5$ ). Atropine increased the rate to  $164.8 \pm 9.69$  bpm ( $n = 5$ ,  $p = 0.009$ ), showing that atropine induced tachycardia compared with the control, whereas propranolol induced bradycardia by decreasing the heart rate to  $106.3 \pm 14.6$  bpm (Fig 1A,  $n = 5$ ,  $p = 0.047$ ). The steady-state heart rates in adult fish under anesthesia with  $80 \mu\text{g/mL}$  of MS-222 and under continuous light conditions, were  $149.6 \pm 12.0$  ( $n = 5$ ) and  $147.9 \pm 9.07$  ( $n = 5$ ) bpm, respectively (Fig 1A), which did not significantly differ from those of the control ( $p = 0.20$  and  $0.37$ , respectively).

The respiratory rate in the control fish was  $296 \pm 8.22$  per min (Fig 1B) and the rates in adult fish administered with propranolol were  $259 \pm 31.1$  per min (Fig 1B), and significantly decrease from control values ( $p = 0.033$ ). The rates in adult fish administered with atropine and MS-222 and adult fish under constant light were  $316 \pm 27.7$ ,  $302 \pm 28.0$  and  $288 \pm 23.6$  per min, respectively (Fig 1B), which did not significantly differ from control values.

## 207 **Control HRV**

208 Fig 1C shows an example of heart rate over a 40-sec period within a 3-min sample from a  
 209 control fish. Specific rhythms seemed to emerge in the form of definite heart rate fluctuations.  
 210 The mean of the power spectral density of the HRV in five adult intact fish (control) shows  
 211 oscillatory periods at frequencies below 1.25 Hz, and at least two specific peaks (Fig 2A, black  
 212 line). Power spectral density at a frequency of 0 Hz was omitted from this analysis and the power  
 213 spectrum was divided into low- (0.02–0.25 Hz, Fig 2B), middle- (0.25–0.65 Hz, Fig 2C) and  
 214 high- (0.65–1.25 Hz, Fig 2D) frequency ranges. The power of these ranges in the control fish was  
 215  $48.2 \pm 24.8$ ,  $171 \pm 115$  and  $98.9 \pm 40.3$  bpm<sup>2</sup>, respectively.

## 216 **Effect of inhibitors for autonomic nervous system on HRV**

217 Figs 1D – F show the heart rate fluctuation induced by 1 mM atropine, 100  $\mu$ M propranolol  
 218 and 80  $\mu$ g/mL of MS-222, respectively. The mean of the power of the HRV in five adult fish that  
 219 were administered with atropine, propranolol and MS-222 of each was shown in Fig 2A (n = 5).  
 220 The mean power of the low-, middle- and high-frequency ranges in the presence of atropine was  
 221  $22.8 \pm 34.3$ ,  $48.0 \pm 44.9$  and  $66.2 \pm 70.9$  bpm<sup>2</sup>, respectively. The power of the low-, middle- and  
 222 high-frequency ranges with propranolol administration was  $191 \pm 96.2$ ,  $147 \pm 54.4$  and  $39.4 \pm$

17.8 bpm<sup>2</sup>, respectively. And those in the low-, middle- and high-frequency ranges under MS-222 anesthesia was  $13.9 \pm 13.8$ ,  $18.0 \pm 9.40$  and  $20.3 \pm 10.1$  bpm<sup>2</sup>, respectively. Atropine significantly reduced the power in the middle-frequency range but not with propranolol (Fig 2C). On the other hand, propranolol increased and decreased the power in the low- and high-frequency ranges despite atropine did not affect in those ranges (Figs 2B and D, respectively). Reductions in the powers of the middle- and high- frequency ranges were statistically significant in MS-222 administered fish (Figs 2B – D).

## **HRV under continuous light**

Fig 1G shows heart rate fluctuation in adults after one week under continuous light. The power of the low-, middle- and high-frequency ranges of these fish was  $51.7 \pm 38.2$ ,  $75.2 \pm 18.7$  and  $75.0 \pm 24.6$  bpm<sup>2</sup>, respectively (Fig 2A blue line; Figs 2B – D). The power in the middle-frequency band was significantly reduced under continuous light for 1 week (Fig 2C).

## **HRV acquirement in medaka**

Figs 3A and B show local minima and maxima identified as the end of diastole and of systole, respectively. Fig 3C shows changes in intensity inside the white ROI in the heart area as an indicator of heartbeat for 20 sec (Figs 3A and B; white circles). Thus, heartbeats were clearly



determined from changes in pixel intensity of the heart area in St. 36 medaka embryos.

The beat-by-beat heart rate in St. 36 embryos essentially remained consistent with minimal fluctuation (Fig 1H). To evaluate the development of the ANS modulation during fish grow, we took the high-speed movies for cardiac activities and analyzed the HRV in st. 36 embryos (n = 5), 1 day post hatch (dph, n = 20) and 7 dph larvae (n = 3) and 1 month old juvenile fish (n = 4). The mean power of the low frequency ranges in embryos, 1 dph, 7 dph and 1 month old fish was  $0.32 \pm 0.31$ ,  $5.43 \pm 2.91$  ( $p < 0.001$ ),  $24.4 \pm 21.7$  ( $p = 0.101$ ) and  $34.6 \pm 34.9$  ( $p = 0.104$ ) bpm<sup>2</sup>, respectively. The mean power of the middle frequency ranges in each stage fish was  $3.39 \pm 2.11$ ,  $26.3 \pm 15.7$  ( $p < 0.001$ ),  $35.0 \pm 22.0$  ( $p = 0.063$ ) and  $53.7 \pm 41.0$  ( $p = 0.677$ ) bpm<sup>2</sup>, respectively. The mean power of the high frequency ranges in each developmental stage was  $3.05 \pm 2.08$ ,  $18.0 \pm 11.8$  ( $p < 0.001$ ),  $21.2 \pm 11.6$  ( $p = 0.054$ ) and  $35.3 \pm 10.8$  ( $p = 0.006$ ) bpm<sup>2</sup>, respectively. There was a tendency of increasing the ANS modulation in all frequency ranges associate with the fish development.

## Discussion

We measured steady-state heart rate and HRV in intact adult medaka by extracting heart

motion data from ventral high-speed video images and spectral analysis. We then defined the characteristics of the HRV regulation by the parasympathetic and sympathetic nervous systems in adult medaka based on these findings.

## **Steady-state heart rate measurement and HRV analysis in medaka**

Previous studies of steady-state heart rates in adult medaka have mainly focused on the effects of temperature on the heartbeat of the isolated heart or on the heart of intact adult medaka. These studies found that the steady-state heart rate of medaka is about 140 bpm at 25°C with or without anesthesia [37-42], with which our findings are consistent. Despite interest in comparative studies of cardiac regulation in vertebrates, only a few investigators have applied spectral analysis to non-mammalian vertebrates. The wide diversity of cardiac-related signals, non-standardized procedures and techniques might have hindered the application of spectral analysis to fish [10]. Although several studies have examined ANS involvement in heart rate regulation, variations in specific frequency ranges of the HRV in fish have not been quantified.

We found here that specific peaks appear in the HRV spectrum of control adult medaka and that the power spectrum of HRV in these fish covers at least three frequency ranges (0.02–0.25, 0.25–0.65 and 0.65–1.25 Hz) presumably because of the regulatory machineries discussed below.

## 271 **Contribution of the ANS to HRV**

272 Atropine, a muscarinic receptor antagonist, reduced fluctuations in the range of 0.25–0.65 Hz  
 273 (middle-frequency range) and induced tachycardia. Propranolol, a  $\beta$ -adrenergic receptor  
 274 antagonist, reduced fluctuation in the range of 0.65–1.25 Hz and induced bradycardia. These  
 275 results suggested that the parasympathetic and sympathetic nervous system primarily modulate  
 276 HRV in the middle- and high-frequency ranges, respectively. Anesthesia with MS-222  
 277 suppressed fluctuations within both the 0.65–1.25 Hz and 0.25–0.65 Hz ranges and confirmed the  
 278 findings, that local anesthetics block both the sympathetic and parasympathetic nervous systems  
 279 [43].

280 Such correspondence of the sympathetic or parasympathetic nervous system with two  
 281 frequency bands in medaka seems to contradict the mammalian system. The central circuit in the  
 282 mammalian sympathetic nervous system is thought to have become slower as network  
 283 complexity has increased due to an evolutionary increase in the number of synapses [44, 45].  
 284 Teleost fish are located nearer the origin than mammals in phylogenetic trees having a true  
 285 ganglionated sympathetic trunk and a distinct vagal system similar to that of mammals, indicating  
 286 that these fish have a primitive sympathetic circuit. Moreover, respiration is slower than heart rate

in mammals, in which the high frequency range of HRV refers to vagal nerve activity that mainly reflects respiratory sinus arrhythmia. However, ventilation caused by opercula movement is faster than the heart rate in fish and the reported frequency range of such movement in medaka is 4–5 Hz at 25°C [37]. Therefore, the effect of respiratory sinus arrhythmia seen in mammals on HRV would be quite small in teleost fish. Evolutionary aspects and respiration style can explain the difference in autonomic modulation of the frequency bands between medaka and mammals.

Although both atropine and anesthesia by MS-222 tended to suppress fluctuations in the low-frequency range, the difference did not reach statistical significance and the fluctuation in this range considerably differed among individual adult fish. Moreover, propranolol remarkably increased fluctuations in the low-frequency range. Bradycardia and occasional rapid movement developed in adult medaka administered with propranolol, presumably because blood flow was decreased, which increased power in the low frequency range. Such increased power could also be attributed to ventricular arrhythmia caused by the induced bradycardia. Therefore, whether the power in the low-frequency range induced in this manner can serve as an effective indicator of ANS activities requires some consideration. Further studies should examine HRV especially at this frequency range using electrocardiography.

## 303 **Influence of environmental disturbance on cardiac ANS**

304 We evaluated the effects of an environmental disturbance caused by exposure to constant light  
305 for one week on the ANS activity in adult medaka. The results showed that only HRV decreased  
306 only in the middle-frequency range. Since fluctuations in the middle- or high-frequency ranges  
307 could indicate parasympathetic or sympathetic nervous activity, respectively, the data suggest  
308 that only parasympathetic nervous activity was reduced under continuous light in adult medaka,  
309 whereas sympathetic nervous activity was less affected.

## 310 **Development of the ANS modulation in medaka**

311 In this study, HRV was hardly observed in st.36 medaka embryos which was before hatching,  
312 but there was a tendency of increase in accordance with the growth in one month after hatching.  
313 Cardiac branches of the autonomic nerve have also been observed in medaka embryos before  
314 hatching [36]. These results suggested that to acquire sufficient function for the autonomic  
315 nervous system will take at least one month time after being formed as a structure.

## 316 **Advantages of using adult medaka as a model animal**

317 Our findings showed that environmental stimuli and anesthesia can both alter the power

spectrum and that ANS activity can be evaluated in unanesthetized adult medaka, when HRV is regulated by both the sympathetic and parasympathetic nervous systems. We found a constant heart rate in medaka embryos, indicating that ANS modulation of HRV has not yet developed in St. 36 medaka embryos, unlike in zebrafish larvae. The use of unanesthetized adult medaka offers advantages for evaluating the impact of environmental stress on ANS activities.

Small fish such as medaka can be reared under the same experimental conditions from the egg to adulthood, and experimental conditions including breeding temperature, lighting schedule and feeding conditions can be easily controlled. Although small fish are difficult to manipulate and cardiac activity is difficult to analyze, small teleosts bred in laboratories are advantageous for studying the effects of environmental conditions on vertebrate ANS activity and development. The transparent adult medaka used herein enabled ANS studies without anesthetics. The medaka system also confers advantages for drug screening and phenotypic analysis of spontaneous or genetically manipulated mutants.

## **Study limitations**

A type II error in the present study is possible owing to the low sample size. Although HRV in the 0.25–0.65 Hz range significantly decreased in the anesthetized fish and in those under

constant light conditions compared with control fish, the steady-state heart rate did not differ from controls despite tendencies towards tachycardia. However, this might also indicate that HRV spectral indices can detect differences in ANS modulation more sensitively than steady-state heart rate. The resampling process might also have acted as a low-pass filter inducing attenuation at the high frequency range.

The number of the opercula movements did not significantly differ, although they tended to increase and decrease under the administration of atropine and propranolol, respectively. Fish exchange gases through branchial respiration and more energy is required for ventilation with gills than with pulmonary respiration [46]. Therefore, HRV regulation by respiratory rate is likely to be more complex in fish than in mammals, despite a correlation between heart rate and respiratory rates [47]. Since we excluded the effects of ventilation movements by data processing before spectral analysis and the number of the opercula movements did not significantly differ, we might have minimized the influence of ventilation frequency in HRV.

In summary, we identified the steady-state heart rate in medaka by extracting heart motion from ventral images and applying spectral analysis, and characterized part of the frequency nature

350 of HRV modulation. Atropine significantly reduced HRV in the middle-frequency range of adult  
351 medaka, suggesting primarily parasympathetic nervous regulation of HRV within this range.  
352 Propranolol significantly reduced HRV in the high-frequency range of adult medaka, suggesting  
353 sympathetic nervous regulation within this frequency range. Such HRV modulations were  
354 assessed from embryo to adult fish in the same system by using this method. Moreover, constant  
355 light reduced HRV only at the middle-frequency range, suggesting the induction of suppressed  
356 parasympathetic nervous activity. The present findings constitute a major contribution to  
357 comprehending precise ANS modulations caused by environmental stimuli and the processes of  
358 ANS maturation.



## Acknowledgements

We are obliged to Dr. Hiroshi Ohshima and Mr. Masafumi Yamamoto for laboratory management. We also express our appreciation to Drs. Tomoaki Matsuo, Masamichi Sudoh, Satomi Tanimoto and Toshiko Ohta for helpful discussions and constructive advice.

## Funding

This study was part of the JAXA-ISS Space Biomedical Research Project (2009–2012) at the Japan Aerospace Exploration Agency and supported by the Ministry of Education, Culture, Sports, Science and Technology [KAKENHI 24310039 to S.O.].

## Disclosure statement

The authors have nothing to declare.

## References

1. Levy MN. Sympathetic-parasympathetic interactions in the heart. *Circ Res*. 1971 Nov;29(5):437-445. <https://doi.org/10.1161/01.res.29.5.437> PMID: 4330524.
2. Steele SL, Yang X, Debiais-Thibaud M, Schwerte T, Pelster B, Ekker M, et al. In vivo and in vitro assessment of cardiac beta-adrenergic receptors in larval zebrafish (*Danio rerio*). *J Exp Biol*. 2011 May 1;214(Pt 9):1445–1457. <https://doi.org/10.1242/jeb.052803> PMID: 21490253.
3. Akselrod S, Gordon D, Ubel FA, Shannon DC, Berger AC, Cohen RJ. Power spectrum analysis of heart rate fluctuation: a quantitative probe of beat-to-beat cardiovascular control. *Science*. 1981 Jul 10;213(4504):220-222. <https://doi.org/10.1126/science.6166045> PMID: 6166045.
4. Heart rate variability. Standards of measurement, physiological interpretation, and clinical use. Task Force of the European Society of Cardiology and the North American Society of Pacing and Electrophysiology. *Eur Heart J*. 1996 Mar;17(3):354-381. PMID: 8737210.
5. Sun P, Zhang Y, Yu F, Parks E, Lyman A, Wu Q, et al. Micro-electrocardiograms to study post-ventricular amputation of zebrafish heart. *Ann Biomed Eng*. 2009 May;37(5):890-901.

- 389        <https://doi.org/10.1007/s10439-009-9668-3> PMID: 19280341; PMCID: PMC6991467.
- 390        6. Taylor EW, Leite CA, Skovgaard N. Autonomic control of cardiorespiratory interactions in
- 391        fish, amphibians and reptiles. Braz J Med Biol Res. 2010 Jul;43(7):600-610.
- 392        <https://doi.org/10.1590/s0100-879x2010007500044> PMID: 20464342.
- 393        7. Yu F, Li R, Parks E, Takabe W, Hsiai TK. Electrocardiogram signals to assess zebrafish heart
- 394        regeneration: implication of long QT intervals. Ann Biomed Eng. 2010 Jul;38(7):2346-2357.
- 395        <https://doi.org/10.1007/s10439-010-9993-6> PMID: 20221900; PMCID: PMC3117900.
- 396        8. Nilsson S. Autonomic nerve function in the vertebrates (13). Springer Science & Business
- 397        Media. 2012.
- 398        9. Altimiras J. Understanding autonomic sympathovagal balance from short-term heart rate
- 399        variations. Are we analyzing noise? Comp Biochem Physiol A Mol Integr Physiol. 1999
- 400        Dec;124(4):447-460. [https://doi.org/10.1016/s1095-6433\(99\)00137-3](https://doi.org/10.1016/s1095-6433(99)00137-3) PMID: 10682243.
- 401        10. Campbell HA, Klepacki JZ, Egginton S. A new method in applying power spectral statistics
- 402        to examine cardio-respiratory interactions in fish. J Theor Biol. 2006 Jul 21;241(2):410-419.
- 403        <https://doi.org/10.1016/j.jtbi.2005.12.005> PMID: 16443239.
- 404        11. Campbell HA, Taylor EW, Egginton S. The use of power spectral analysis to determine

- cardiorespiratory control in the short-horned sculpin *Myoxocephalus scorpius*. J Exp Biol. 2004 May;207(Pt 11):1969-1976. <https://doi.org/10.1242/jeb.00972> PMID: 15107449.
12. Sun L, Lien CL, Xu X, Shung KK. In vivo cardiac imaging of adult zebrafish using high frequency ultrasound (45-75 MHz). Ultrasound Med Biol. 2008 Jan;34(1):31-39. <https://doi.org/10.1016/j.ultrasmedbio.2007.07.002> PMID: 17825980; PMCID: PMC2292109.
13. Milan DJ, Jones IL, Ellinor PT, MacRae CA. In vivo recording of adult zebrafish electrocardiogram and assessment of drug-induced QT prolongation. Am J Physiol Heart Circ Physiol. 2006 Jul;291(1):H269-H273. <https://doi.org/10.1152/ajpheart.00960.2005> PMID: 16489111.
14. Rombough PJ. Ontogenetic changes in the toxicity and efficacy of the anaesthetic MS222 (tricaine methanesulfonate) in zebrafish (*Danio rerio*) larvae. Comp Biochem Physiol A Mol Integr Physiol. 2007 Oct;148(2):463-469. <https://doi.org/10.1016/j.cbpa.2007.06.415> PMID: 17643329.
15. Hedrick MS, Winmill RE. Excitatory and inhibitory effects of tricaine (MS-222) on fictive breathing in isolated bullfrog brain stem. Am J Physiol Regul Integr Comp Physiol. 2003

- Feb;284(2):R405-R412. <https://doi.org/10.1152/ajpregu.00418.2002> PMID: 12414435.
16. Huang WC, Hsieh YS, Chen IH, Wang CH, Chang HW, Yang CC, et al. Combined use of MS-222 (tricaine) and isoflurane extends anesthesia time and minimizes cardiac rhythm side effects in adult zebrafish. *Zebrafish*. 2010 Sep;7(3):297-304. <https://doi.org/10.1089/zeb.2010.0653> PMID: 20807039.
17. RANDALL DJ. Effect of an anaesthetic on the heart and respiration of teleost fish. *Nature*. 1962 Aug 4;195:506. <https://doi.org/10.1038/195506a0> PMID: 14490222.
18. Chan PK, Lin CC, Cheng SH. Noninvasive technique for measurement of heartbeat regularity in zebrafish (*Danio rerio*) embryos. *BMC Biotechnol*. 2009 Feb 19;9:11. <https://doi.org/10.1186/1472-6750-9-11> PMID: 19228382; PMCID: PMC2664803.
19. Fink M, Callol-Massot C, Chu A, Ruiz-Lozano P, Izpisua Belmonte JC, Giles W, et al. A new method for detection and quantification of heartbeat parameters in *Drosophila*, zebrafish, and embryonic mouse hearts. *Biotechniques*. 2009 Feb;46(2):101-113. <https://doi.org/10.2144/000113078>. PMID: 19317655; PMCID: PMC2855226.
20. Mann KD, Hoyt C, Feldman S, Blunt L, Raymond A, Page-McCaw PS. Cardiac response to startle stimuli in larval zebrafish: sympathetic and parasympathetic components. *Am J*

- 437        Physiol    Regul    Integr    Comp    Physiol.    2010    May;298(5):R1288-1297.
- 438        <https://doi.org/10.1152/ajpregu.00302.2009> Epub 2010 Feb 3. PMID: 20130228.
- 439    21. Taylor EW, Leite CA, Levings JJ. Central control of cardiorespiratory interactions in fish.
- 440        Acta Histochem. 2009;111(3):257-267. <https://doi.org/10.1016/j.acthis.2008.11.006> PMID:
- 441        19193400.
- 442    22. Yoshida M, Hirano R, Shima T. Photocardiography: a novel method for monitoring cardiac
- 443        activity in fish. Zoolog Sci. 2009 May;26(5):356-61. <https://doi.org/10.2108/zsj.26.356>
- 444        PMID: 19715506.
- 445    23. Martin JS, Renshaw SA. Using in vivo zebrafish models to understand the biochemical basis
- 446        of neutrophilic respiratory disease. Biochem Soc Trans. 2009 Aug;37(Pt 4):830-837.
- 447        <https://doi.org/10.1042/BST0370830> PMID: 19614603.
- 448    24. Matsui H, Ito H, Taniguchi Y, Inoue H, Takeda S, Takahashi R. Proteasome inhibition in
- 449        medaka brain induces the features of Parkinson's disease. J Neurochem. 2010
- 450        Oct;115(1):178-187. <https://doi.org/10.1111/j.1471-4159.2010.06918.x> PMID: 20649841.
- 451    25. Matsumoto T, Terai S, Oishi T, Kuwashiro S, Fujisawa K, Yamamoto N, et al. Medaka as a
- 452        model for human nonalcoholic steatohepatitis. Dis Model Mech. 2010 Jul-Aug;3(7-8):431-40.

- 453        <https://doi.org/10.1242/dmm.002311> PMID: 20371730.
- 454    26. Watanabe-Asaka T, Mukai C, Mitani H Technologies and Analyses Using Medaka to
- 455        Evaluate Effects of Space on Health. Biol Sci Space. 2010;24(1):3-9.
- 456        <https://doi.org/10.2187/bss.24.3>
- 457    27. Jacob E, Drexel M, Schwerte T, Pelster B. Influence of hypoxia and of hypoxemia on the
- 458        development of cardiac activity in zebrafish larvae. Am J Physiol Regul Integr Comp Physiol.
- 459        2002 Oct;283(4):R911-7. <https://doi.org/10.1152/ajpregu.00673.2001> PMID: 12228061.
- 460    28. Schwerte T, Prem C, Mairösl A, Pelster B. Development of the sympatho-vagal balance in
- 461        the cardiovascular system in zebrafish (Danio rerio) characterized by power spectrum and
- 462        classical signal analysis. J Exp Biol. 2006 Mar;209(Pt 6):1093-100.
- 463        <https://doi.org/10.1242/jeb.02117> PMID: 16513936.
- 464    29. Kasahara M, Naruse K, Sasaki S, Nakatani Y, Qu W, Ahsan B, et al. The medaka draft
- 465        genome and insights into vertebrate genome evolution. Nature. 2007 Jun 7;447(7145):714-9.
- 466        <https://doi.org/10.1038/nature05846> PMID: 17554307.
- 467    30. Wittbrodt J, Shima A, Scharf M. Medaka--a model organism from the far East. Nat Rev
- 468        Genet. 2002 Jan;3(1):53-64. <https://doi.org/10.1038/nrg704>. PMID: 11823791.

- 469 31. Fukamachi S, Kinoshita M, Tsujimura T, Shimada A, Oda S, Shima A, et al. Rescue from  
470 oculocutaneous albinism type 4 using medaka slc45a2 cDNA driven by its own promoter.  
471 Genetics. 2008 Feb;178(2):761-9. <https://doi.org/10.1534/genetics.107.073387> PMID:  
472 18245373; PMCID: PMC2248340.
- 473 32. Shimada A, Fukamachi S, Wakamatsu Y, Ozato K, Shima A. Induction and characterization  
474 of mutations at the b locus of the medaka, *Oryzias latipes*. Zoolog Sci. 2002 Apr;19(4):411-7.  
475 <https://doi.org/10.2108/zsj.19.411> PMID: 12130818.
- 476 33. Iwamatsu T. Stages of normal development in the medaka *Oryzias latipes*. Mech Dev. 2004  
477 Jul;121(7-8):605-18. <https://doi.org/10.1016/j.mod.2004.03.012> PMID: 15210170.
- 478 34. Nagata K, Hashimoto C, Watanabe-Asaka T, Itoh K, Yasuda T, Ohta K, et al. In vivo 3D  
479 analysis of systemic effects after local heavy-ion beam irradiation in an animal model. Sci  
480 Rep. 2016 Jun 27;6:28691. <https://doi.org/10.1038/srep28691> PMID: 27345436; PMCID:  
481 PMC4922018.
- 482 35. Watanabe-Asaka T, Niihori M, Terada M, Oda S, Iwasaki K, Sudoh M, et al. Technology  
483 with High-Speed Movies to Analyze the Movement of Internal Organs in Medaka. Transac  
484 Jpn Soc Aeronautica Space Sci Aerospace Technol Jpn. 2012;10 (ists28):1-4.



- 485        [https://doi.org/10.2322/tastj.10.Pp\\_1](https://doi.org/10.2322/tastj.10.Pp_1)
- 486    36. Watanabe-Asaka T, Sekiya Y, Wada H, Yasuda T, Okubo I, Oda S, et al. Regular heartbeat
- 487        rhythm at the heartbeat initiation stage is essential for normal cardiogenesis at low
- 488        temperature. BMC Dev Biol. 2014 Feb 25;14:12. <https://doi.org/10.1186/1471-213X-14-12>
- 489        PMID: 24564206; PMCID: PMC3936829.
- 490    37. Iwamatsu T. The integrated book for the biology of the medaka. Okayama: University
- 491        Education Press; 1997
- 492    38. Kawasaki T, Saito K, Deguchi T, Fujimori K, Tadokoro M, Yuba S, et al. Pharmacological
- 493        characterization of isoproterenol-treated medaka fish. Pharmacol Res. 2008
- 494        Nov-Dec;58(5-6):348-55. <https://doi.org/10.1016/j.phrs.2008.09.011> PMID: 18951980.
- 495    39. Matsui K. Temperature and heart beat in a fish embryo, *Oryzias latipes*. Sci Rep Tokyo
- 496        Bunrika Daigaku. 1941;B5:313-324.
- 497    40. Matsuura Y. Effect of temperature on heart beat in *Oryzias latipes*. Zool Mag.
- 498        1933;45:367-368.
- 499    41. Tsukuda H. Temperature accommodation of heart beats in fresh water teleosts. Zool Mag.
- 500        1962;71:46.

- 501 42. Kojima T, Neishi H, Yoshizaki Y, Soeda H. Power Spectrum Analysis of Fish Heart Rate  
502 Variability Using Maximum Entropy Method. Fisheries Eng. 2001;38(2):145-150.  
503 [https://doi.org/10.18903/fisheng.38.2\\_145](https://doi.org/10.18903/fisheng.38.2_145)
- 504 43. Introna R, Yodlowski E, Pruett J, Montano N, Porta A, Crumrine R. Sympathovagal effects  
505 of spinal anesthesia assessed by heart rate variability analysis. Anesth Analg. 1995  
506 Feb;80(2):315-321. <https://doi.org/10.1097/00000539-199502000-00019> PMID: 7818119.
- 507 44. Jänig W. Spinal cord reflex organization of sympathetic systems. Prog Brain Res.  
508 1996;107:43-77. [https://doi.org/10.1016/s0079-6123\(08\)61858-0](https://doi.org/10.1016/s0079-6123(08)61858-0) PMID: 8782513.
- 509 45. Kumada M, Terui N, Kuwaki T. Arterial baroreceptor reflex: its central and peripheral neural  
510 mechanisms. Prog Neurobiol. 1990;35(5):331-361.  
511 [https://doi.org/10.1016/0301-0082\(90\)90036-g](https://doi.org/10.1016/0301-0082(90)90036-g) PMID: 2263735.
- 512 46. William K. Milsom. Mechanisms of ventilation in lower vertebrates: adaptations to  
513 respiratory and nonrespiratory constraints. Can J Zool. 1989;67(12):2943-2955.  
514 <https://doi.org/10.1139/z89-417>
- 515 47. Randall DJ. The nervous control of cardiac activity in the tench (*Tinca tinca*) and the goldfish  
516 (*Carassius auratus*). Physiol Zool. 1966;39(3):185-192

517      <https://doi.org/10.1086/physzool.39.3.30152846>

518

## 520 **Figure legends**

521 Fig 1.

522 **Average of steady-state heart rate, respiratory rate and examples of beat-by-beat heart**  
523 **rates.**

524 Group averaged steady-state heart rate were plotted under each condition (A). Group averaged  
525 respiratory rate (per min) were plotted under each condition in adult medaka (B). Standard  
526 deviations among five fish are plotted as error bars. Examples of beat-by-beat heart rate changes  
527 for 40 s under each experimental condition are presented (C-H). Control (C), 1 mM atropine (D),  
528 100  $\mu$ M propranolol (E), anesthesia with 80  $\mu$ g/mL MS-222 (F), continuous light (G) and St. 36  
529 embryo (H).

530

531 Fig 2.

532 **Power spectral analysis of HRV for 3 min in medaka.**

533 Power spectral density of HRV in adult control fish, administered with 1 mM atropine, 100  $\mu$ M  
534 propranolol, 80  $\mu$ g/mL MS-222 and under 1-week continuous light and St. 36 embryos was  
535 obtained by fast Fourier transformation using DADiSP software. The mean of power spectral

density of HRV in five fish under each condition is shown. Low (0.015625–0.25 Hz), middle (0.25–0.65 Hz) and high (0.65–1.25 Hz) frequencies are shown as gray, black and white bars, respectively (A). The amount of power was added in each frequency range and error bars are standard deviations among five fish. Data from individual fish are indicated as black dots (B–D). B, 0.01625–0.25 Hz. C, 0.25–0.65 Hz. D, 0.65–1.25 Hz.  $*P < 0.05$ ,  $^{\dagger}P < 0.01$ ,  $^{\ddagger}P < 0.005$ , compared with control.

Fig 3.

#### **Automated extraction of heart movement in embryos.**

Sample pictures are at diastole and systole (A and B) in embryonic heart area view. Pixel intensities in the white circular ROI were extracted as numerical data. Twenty seconds of total intensity in white circles throughout the entire series were plotted after being smoothed by the 21-point moving average (C). a, atrium; v, ventricle.

Fig 4.

#### **Power spectral analysis of HRV for 3 min according to development.**

552 Power spectral density and the mean of power spectral density of HRV in st.36 embryos (n = 5),  
 553 1 day post hatch (dph) larvae (n = 20), 7 dph larvae (n = 3) and 1 month old juvenile (n = 4) was  
 554 obtained by fast Fourier transformation using DADiSP software. Low (0.015625–0.25 Hz),  
 555 middle (0.25–0.65 Hz) and high (0.65–1.25 Hz) frequencies are shown in panels A – C,  
 556 respectively. The amount of power was added in each frequency range and error bars are standard  
 557 deviations among samples. A, 0.01625–0.25 Hz. B, 0.25–0.65 Hz. C, 0.65–1.25 Hz.  $^{\dagger}P < 0.005$ ;  
 558 compared with st.36 embryos.

559

560

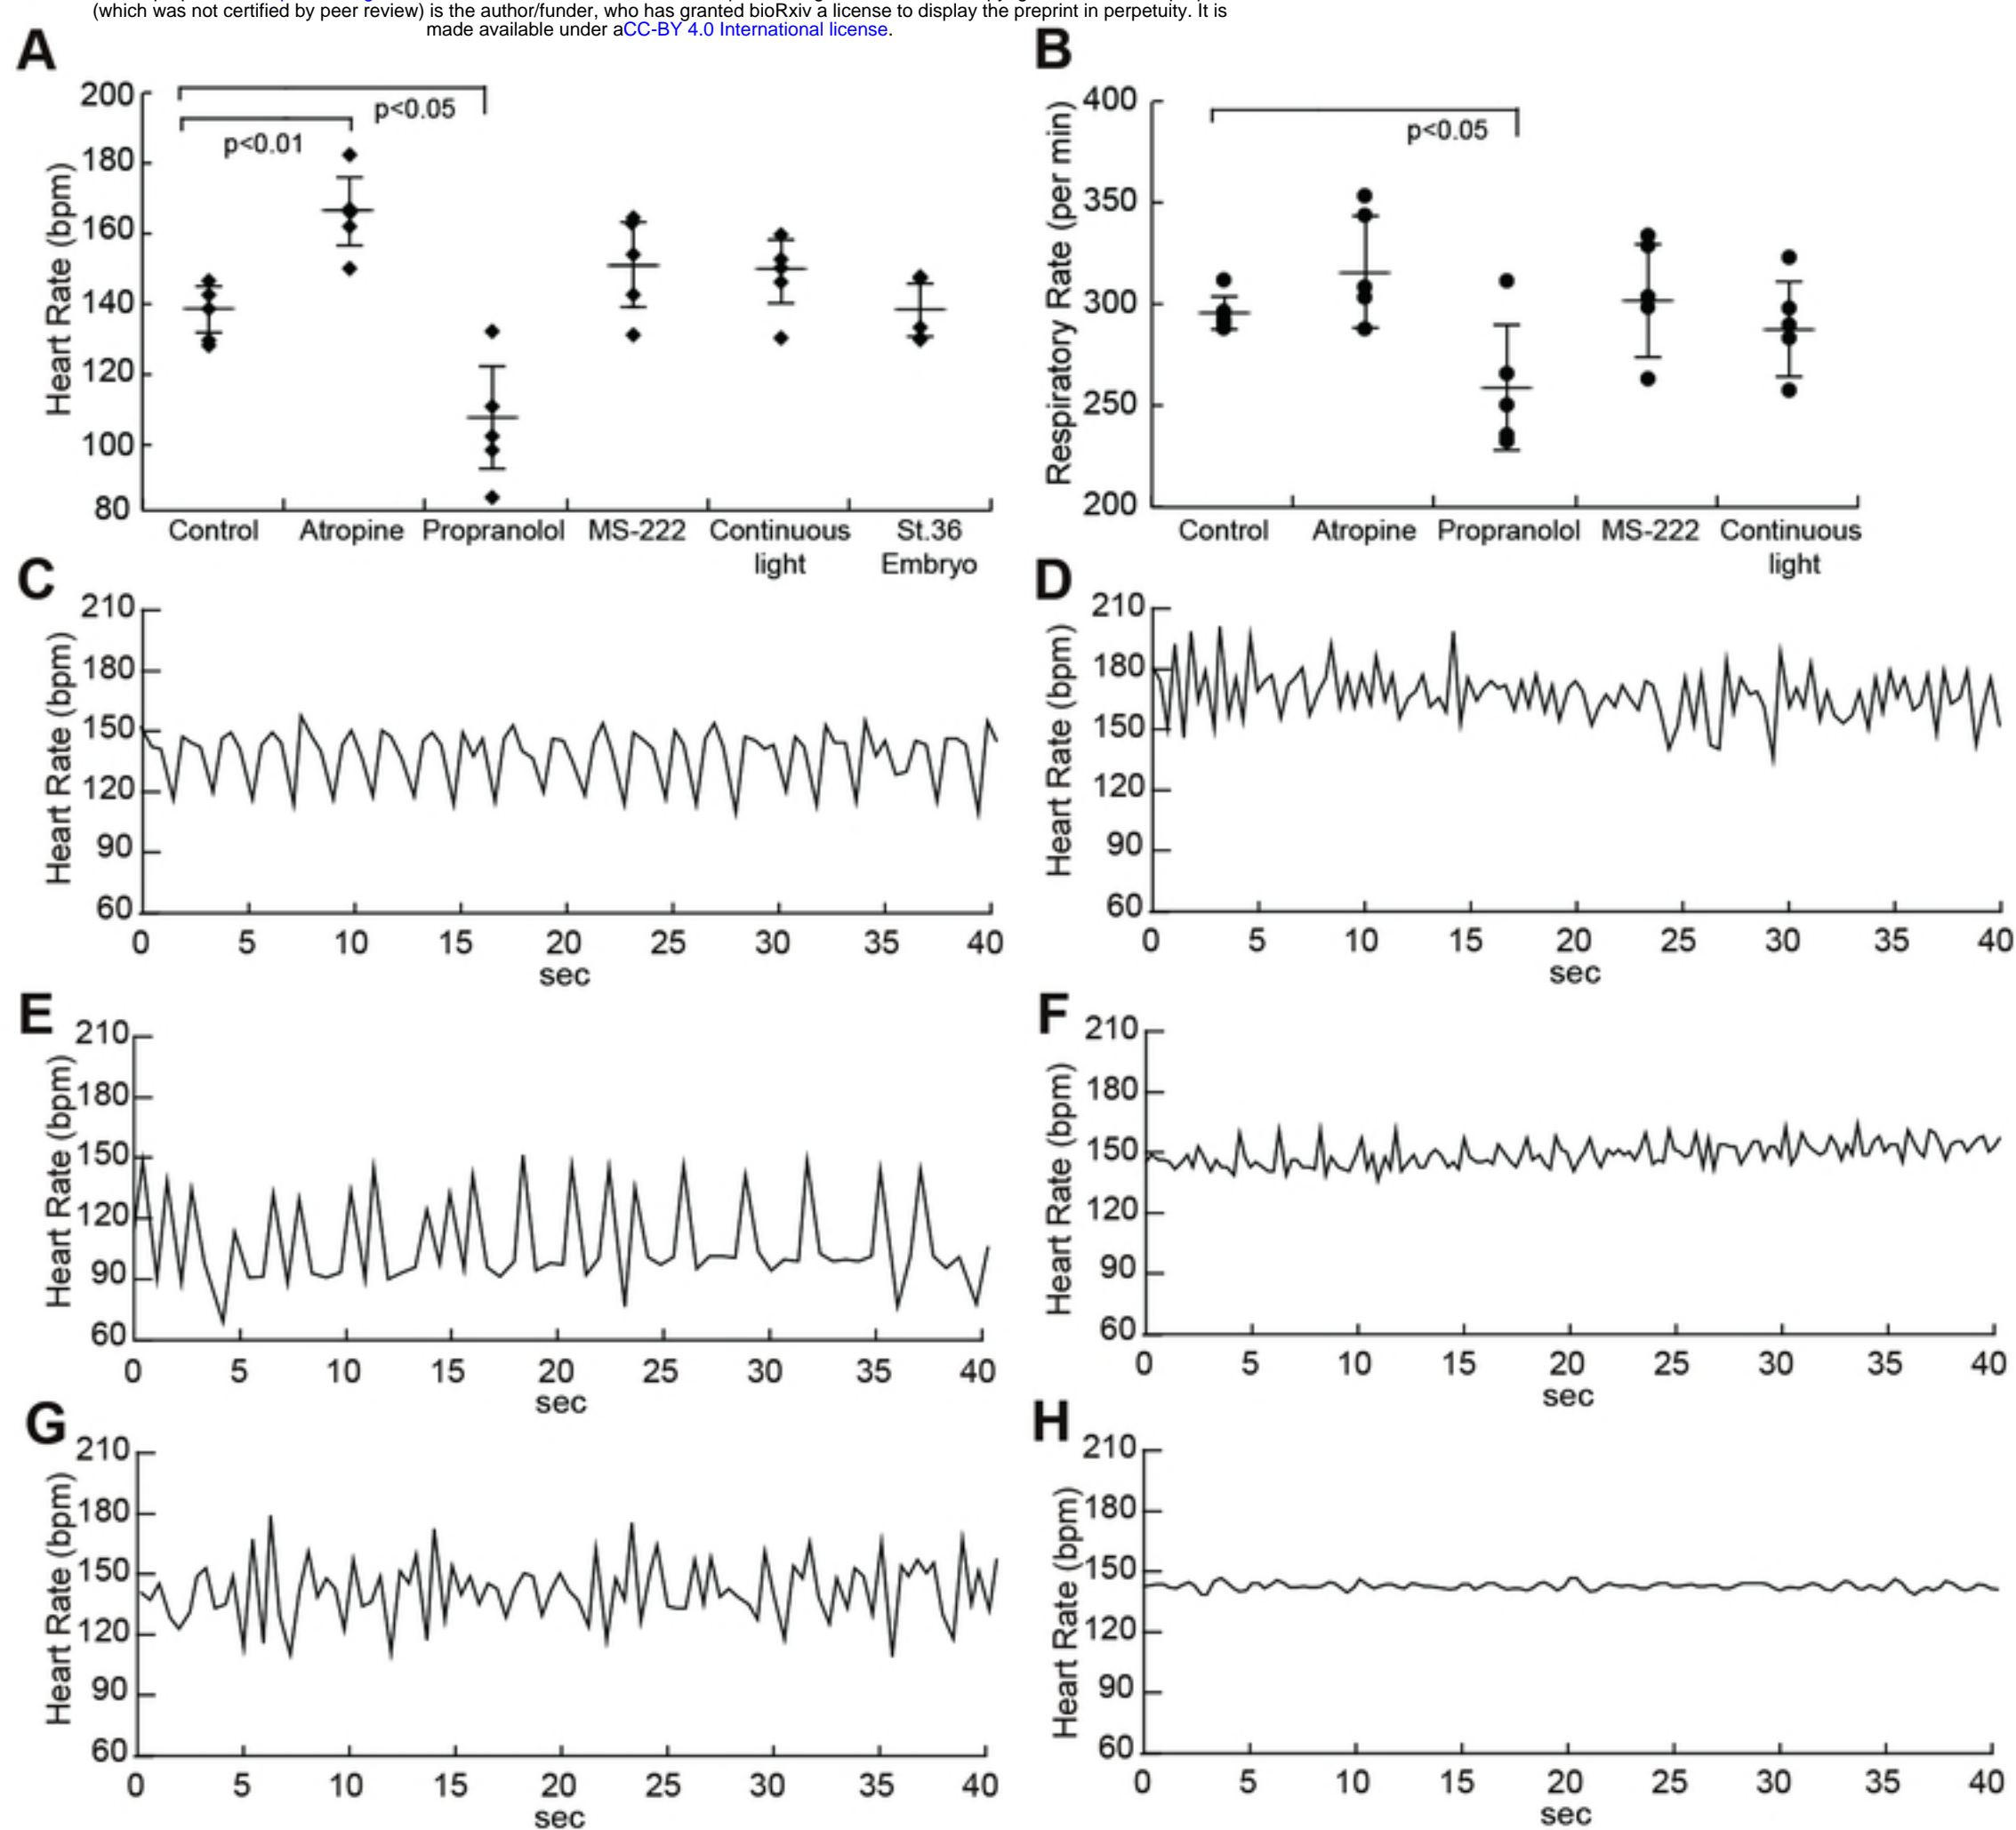

Figure 1

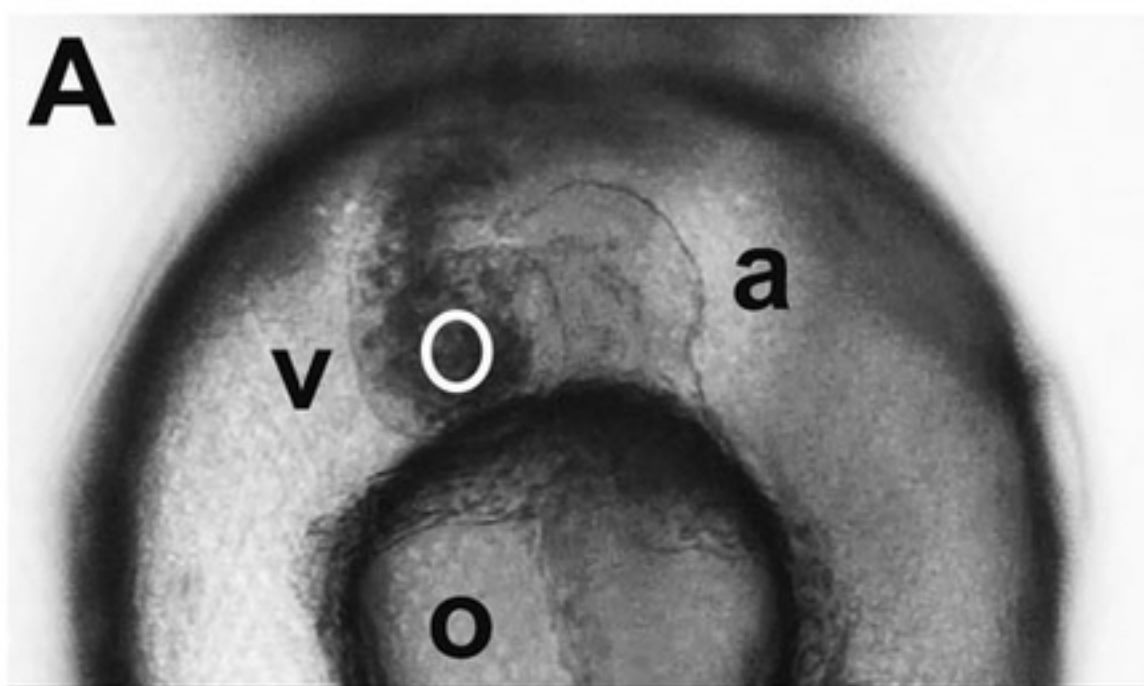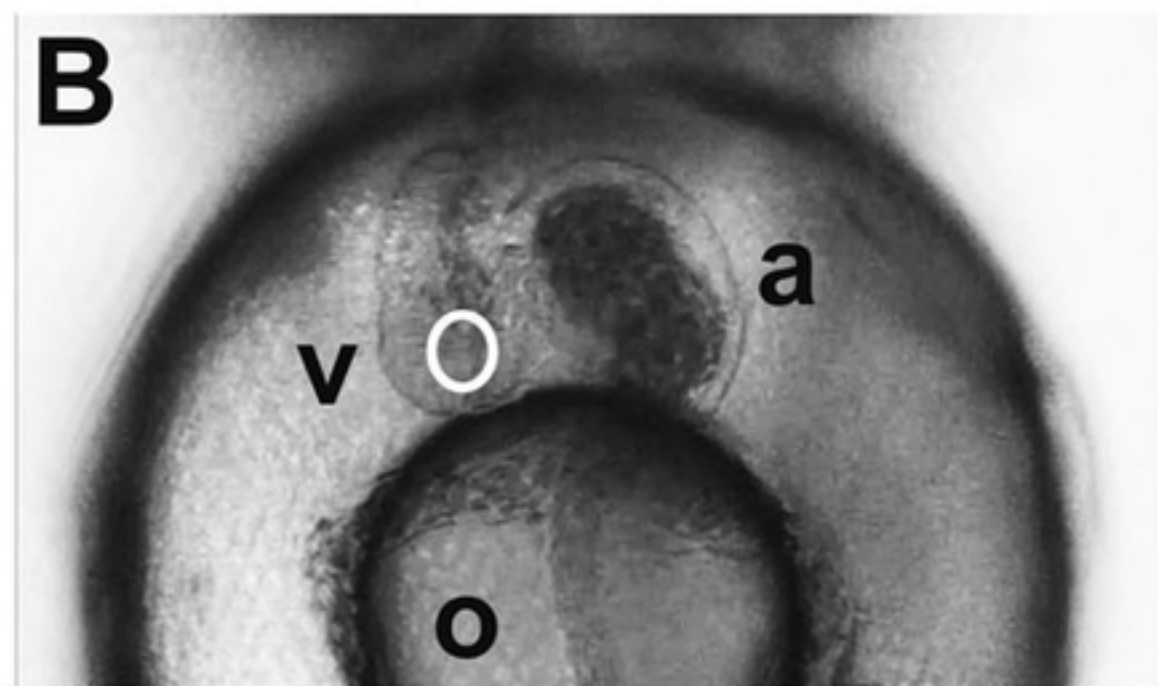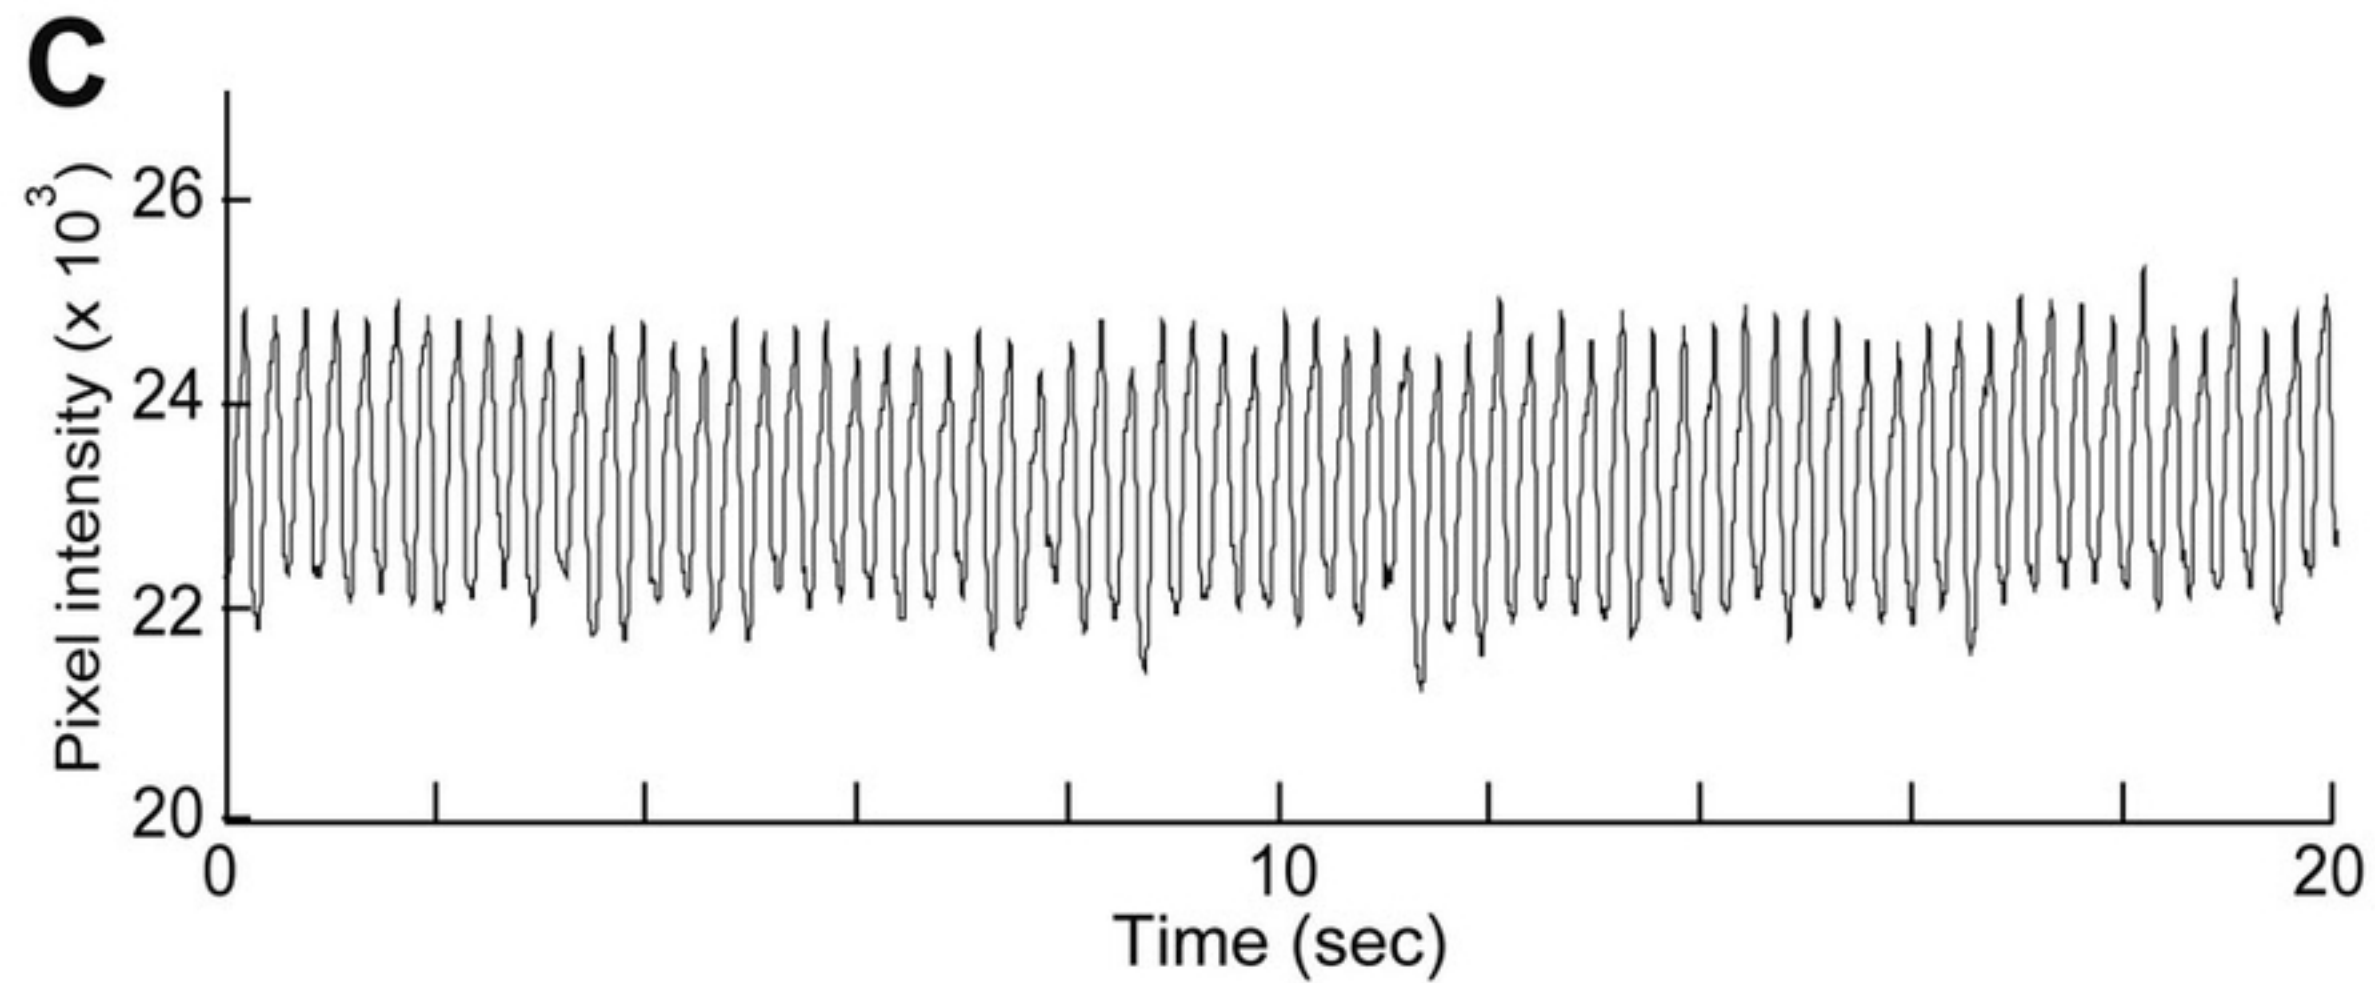

Figure 3



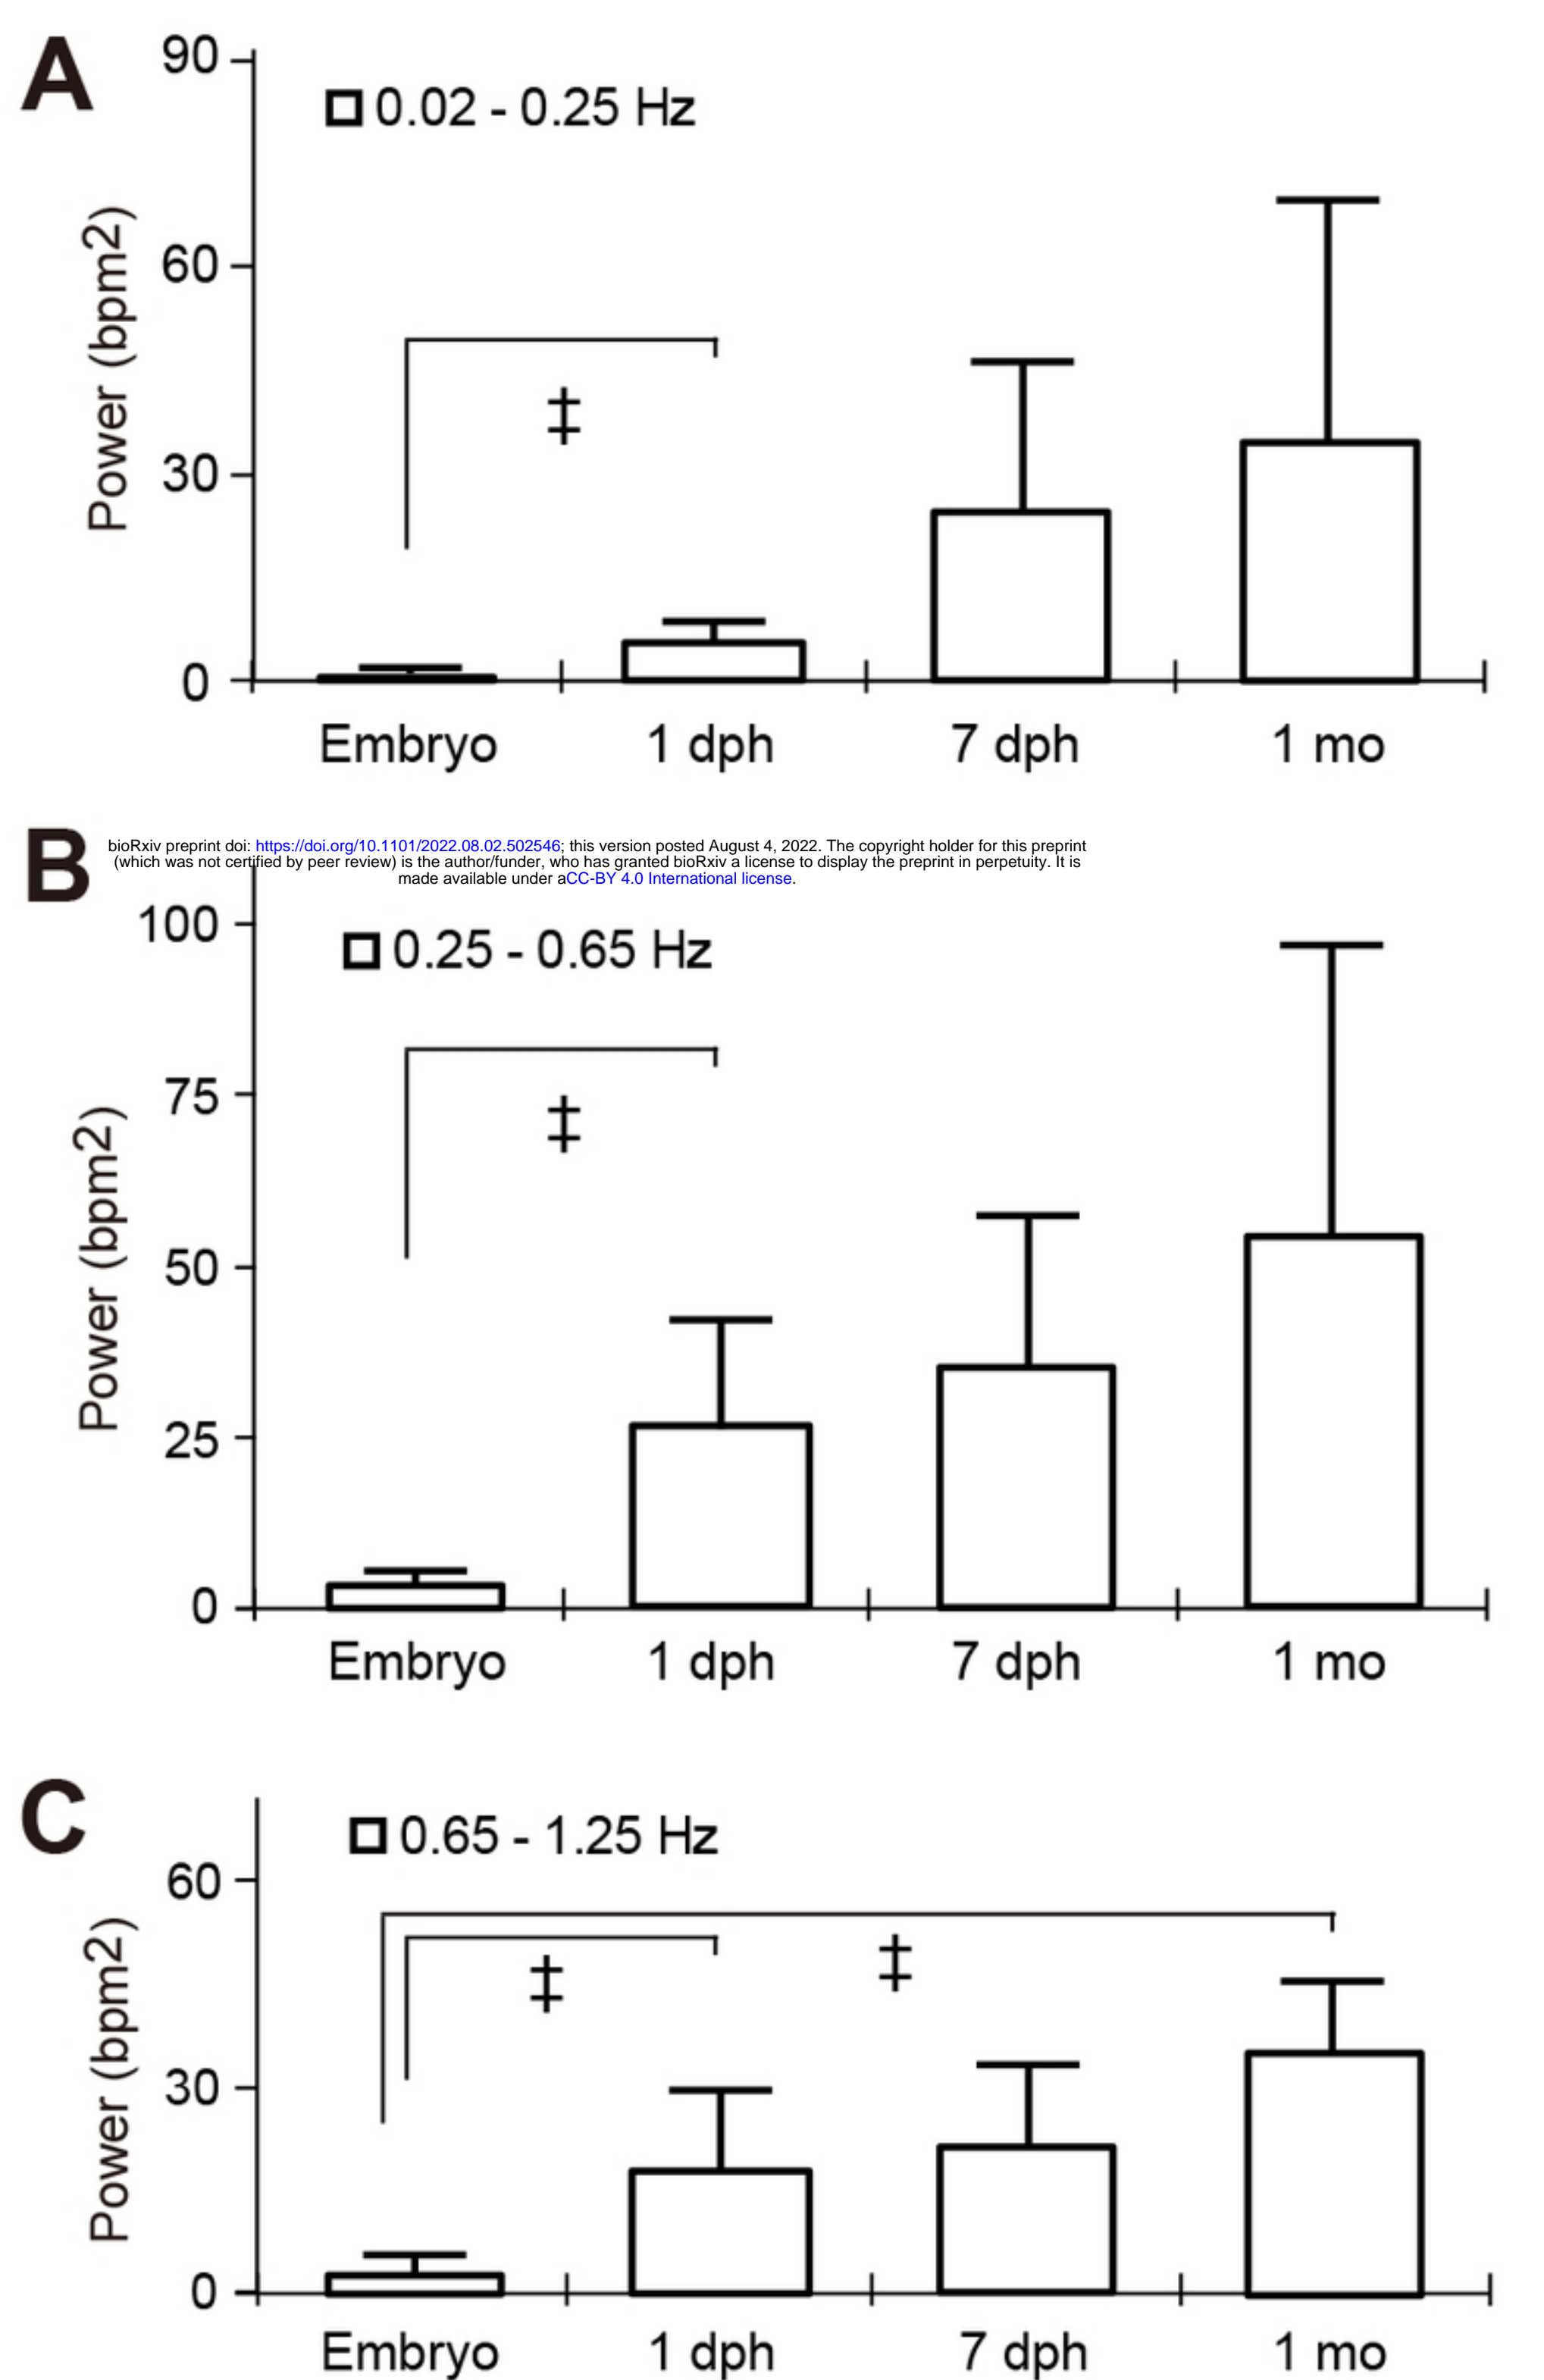

Figure 4

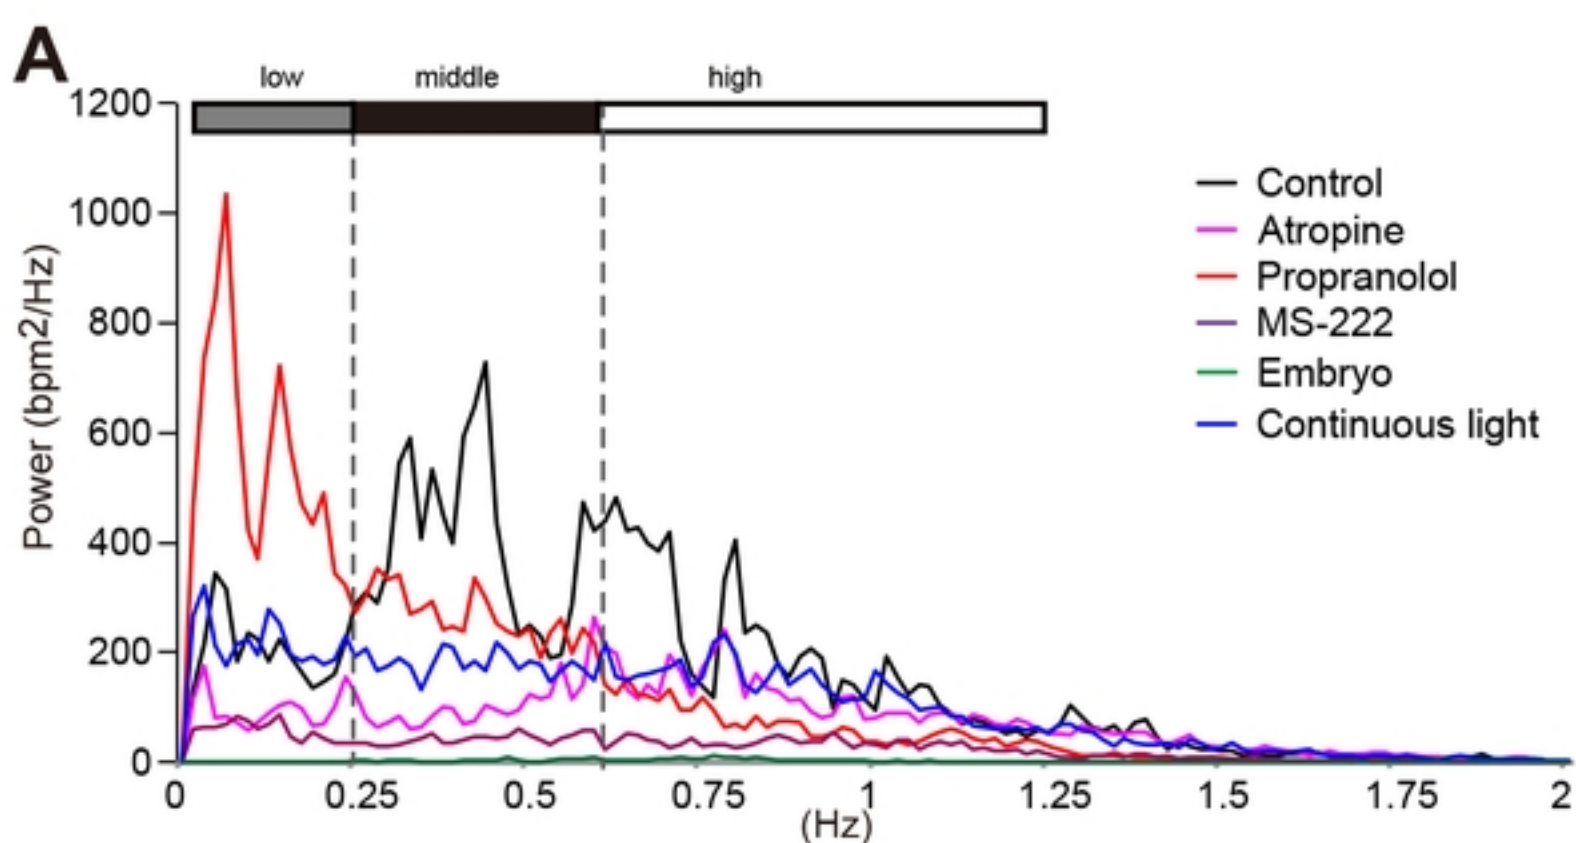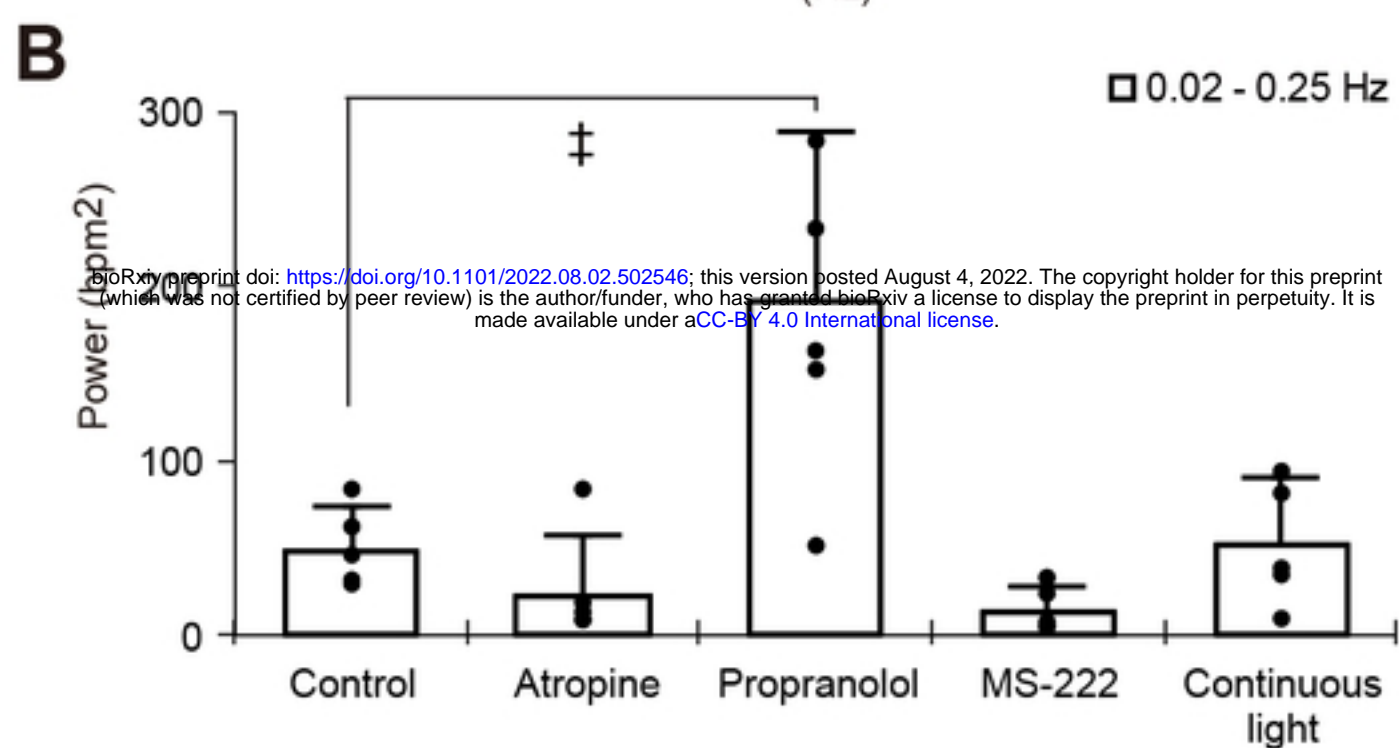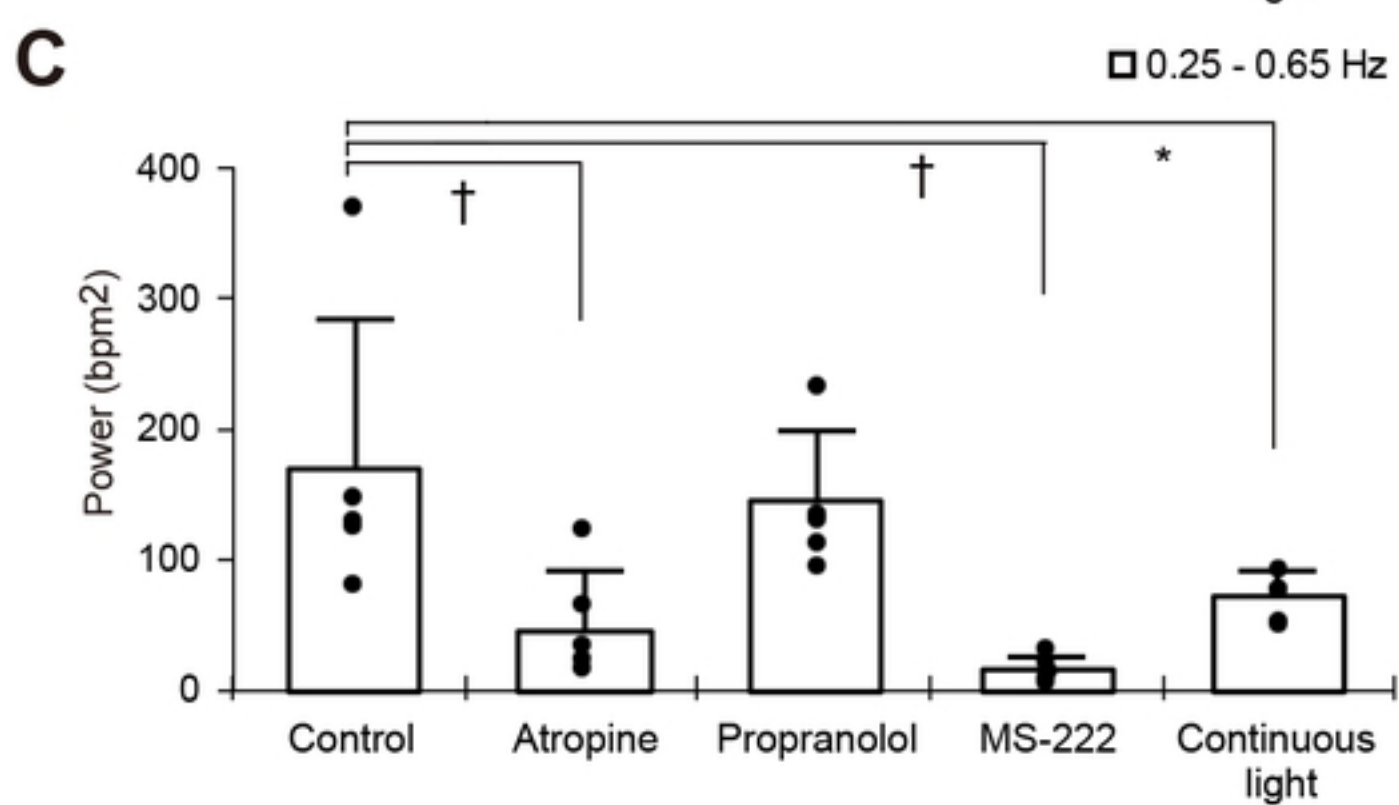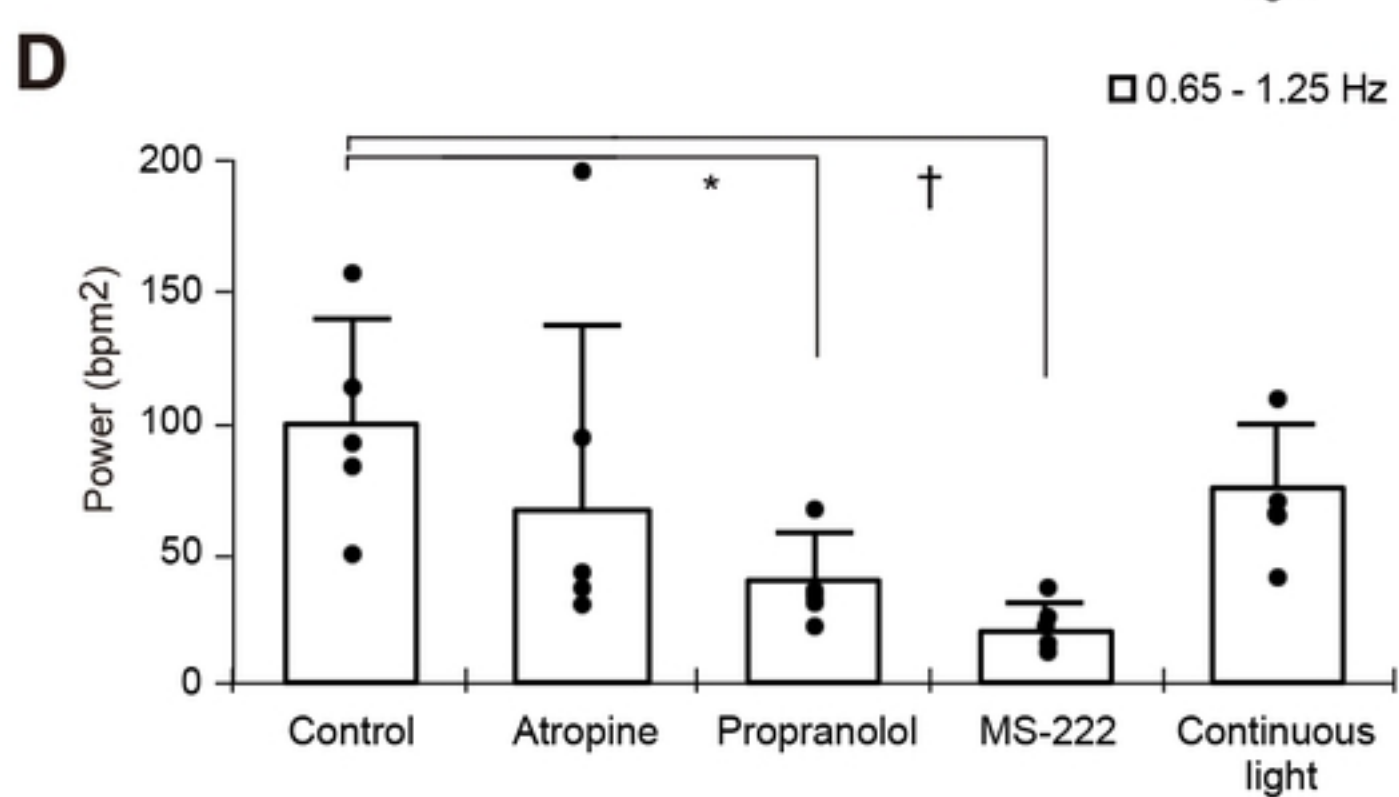

Figure 2
